# Supplementary material
Source: PubMed Central journal article supplement (PMC4559850)

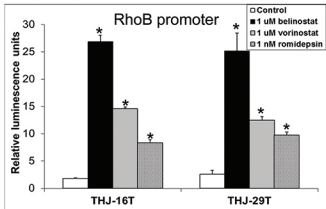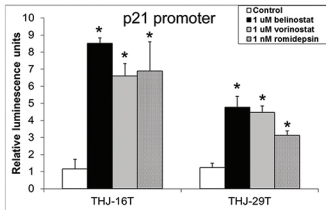

Supplement: NIHMS711538-supplement-1.pdf [file NIHMS711538-supplement-1.pdf]

Figure s3

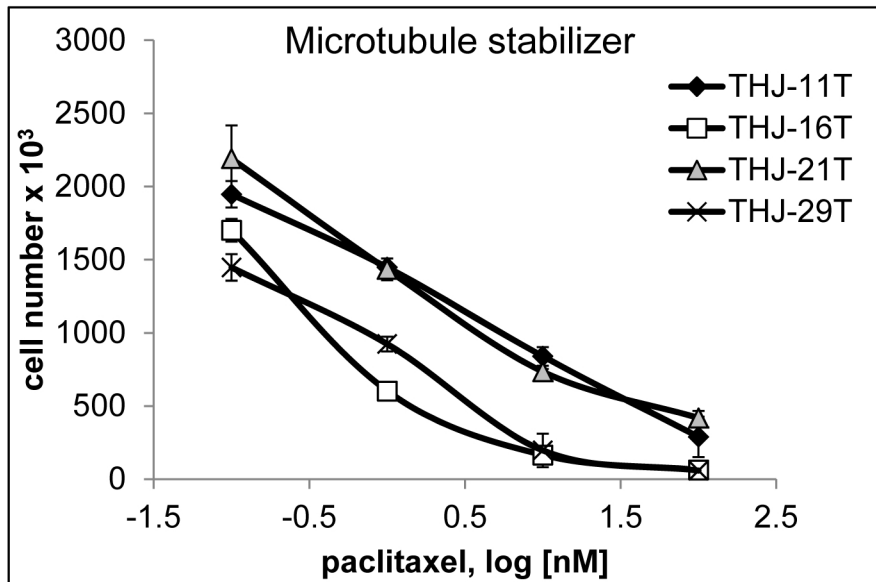

Supplement: NIHMS711538-supplement-3.pdf [file NIHMS711538-supplement-3.pdf]
